# Supplementary material
Source: publisher figshare collection journal article supplement (https://tandf.figshare.com/ndownloader/files/20186658)
Supplement: Supplementary file 1 [file 20186658]

**Appendix 1: indexing keywords, crawler seeds, and geodesics**

***Keywords***

*Keywords used for seed search and to index webpages:*

“Climate change”, “global warming”

***Crawler seeds***

*Climate advocates:*

Seed 1: Greenpeace, UK (http://www.greenpeace.org.uk/climate)

Seed 2: World Wildlife Fund for Nature, UK (http://www.wwf.org.uk/what_we_do/tackling_climate_change/)

Seed 3: Friends of the Earth (http://www.foe.org/projects/climate-and-energy)

Seed 4: Oxfam (http://www.oxfam.org.uk/oxfam_in_action/issues/climate.htm)

*Climate sceptics:*

Seed 5: Climate Resistance (http://www.climate-resistance.org/)

Seed 6: Global Warming Hysteria (http://www.globalwarminghysteria.com/)

Seed 6a: Global Cooling and New Ice Age UK (http://globalcoolingnewiceageuk.blogspot.ch/)

Seed 7: Repeal of the Climate Change Act (http://repealtheact.org.uk/)

Seed 8: The Global Warming Policy Foundation (http://thegwpf.org/)

***Seed geodesic distances***

Table 6

*Distributions of average geodesic distances of crawler seeds over all networks*

| Seed | Min. | Max. | M | SD |
| --- | --- | --- | --- | --- |
| Seed 1 | 1.86 | 2.24 | 2.04 | 0.12 |
| Seed 2 | 2.06 | 2.80 | 2.38 | 0.31 |
| Seed 3 | 2.08 | 2.45 | 2.25 | 0.14 |
| Seed 4 | 0.80 | 4.93 | 2.83 | 0.93 |
| Seed 5 | 1.41 | 1.66 | 1.54 | 0.07 |
| Seed 6 | 2.44 | 2.61 | 2.54 | 0.04 |
| Seed 6a | 2.92 | 3.71 | 3.19 | 0.45 |
| Seed 7 | 2.11 | 2.24 | 2.18 | 0.03 |
| Seed 8 | 2.03 | 2.99 | 2.32 | 0.20 |

*Note*. Seed 6 was replaced with Seed 6a in crawl 28; the values for Seed 6a are only reported for these crawls.
